# Supplementary material for: Hydrothermal synthesis of nanostructured flower-like Ni(OH)2particles and their excellent sensing performance towards low concentration HCN gas
Source: Royal Society of Chemistry journal article supplement (doi:10.1039/c5ra02742j), 2015-01-01
Supplement: c5ra02742j1.pdf [file c5ra02742j1.pdf]

**Hydrothermal Synthesis of Nanostructured Flower-like Ni(OH)<sub>2</sub>  
Particles and their Excellent Sensing Performance towards Low  
Concentration HCN Gas**

**Mingzhen Hu<sup>a,b</sup>, Junhui He<sup>a,\*</sup>, Mingqing Yang<sup>a</sup>, Xiaochun Hu<sup>c</sup>, Chunxiao Yan<sup>c</sup>  
and Zhenxing Cheng<sup>c</sup>**

<sup>a</sup> *Functional Nanomaterials Laboratory, Center for Micro/Nanomaterials and Technology and Key Laboratory of Photochemical Conversion and Optoelectronic Materials, Technical Institute of Physics and Chemistry, Chinese Academy of Sciences, Zhongguancundonglu 29, Haidianqu, Beijing 100190, China*

<sup>b</sup> *University of Chinese Academy of Sciences, Beijing 100049, China*

<sup>c</sup> *The No.3 Department, Institute of Chemical Defence, P.O.Box 1048, Beijing 102205, China*

\* Corresponding author. Fax: +86 10 82543535. E-mail address: [jhhe@mail.ipc.ac.cn](mailto:jhhe@mail.ipc.ac.cn).

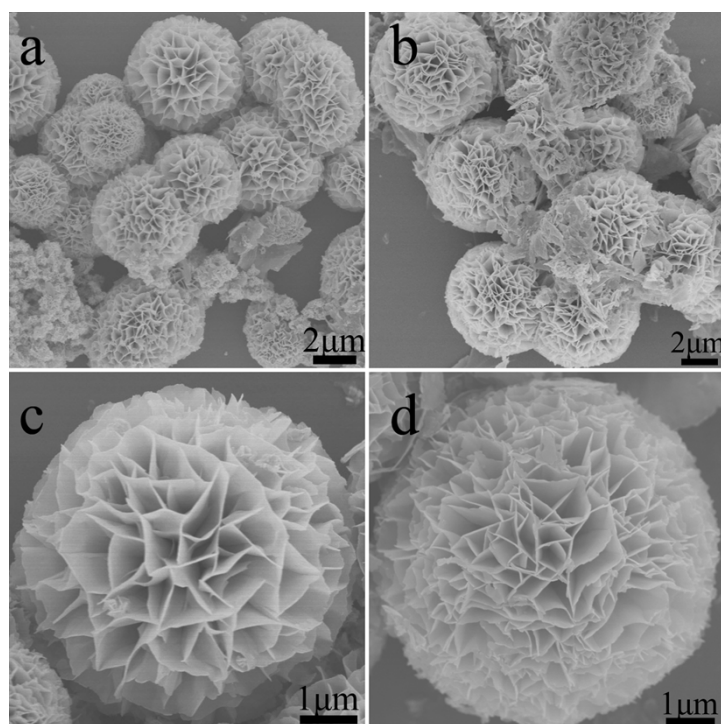

**Fig. S1** Typical SEM images of Ni(OH)<sub>2</sub> products fabricated at varied hydrometal temperatures under otherwise identical conditions (SDBS/Ni molar ratio: 0.1, reaction time: 7 h): (a,c) 80 °C, (b,d) 140 °C.

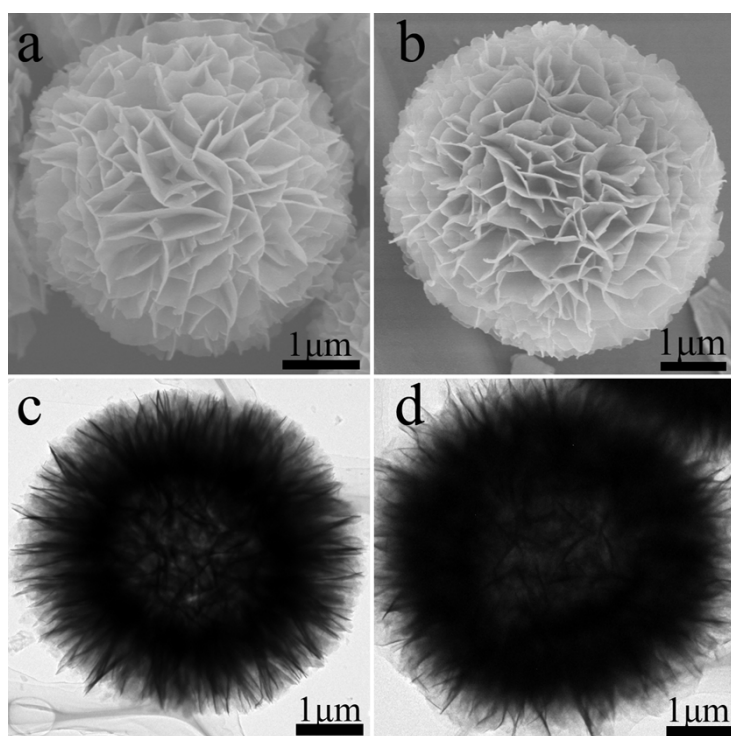

**Fig. S2** Typical SEM and TEM images of  $\text{Ni}(\text{OH})_2$  products synthesized using varied periods of reaction time under otherwise identical conditions (SDBS/Ni molar ratio: 0.1, hydromal temperature: 100 °C): (a,c): 3 h, (b,d): 12 h.

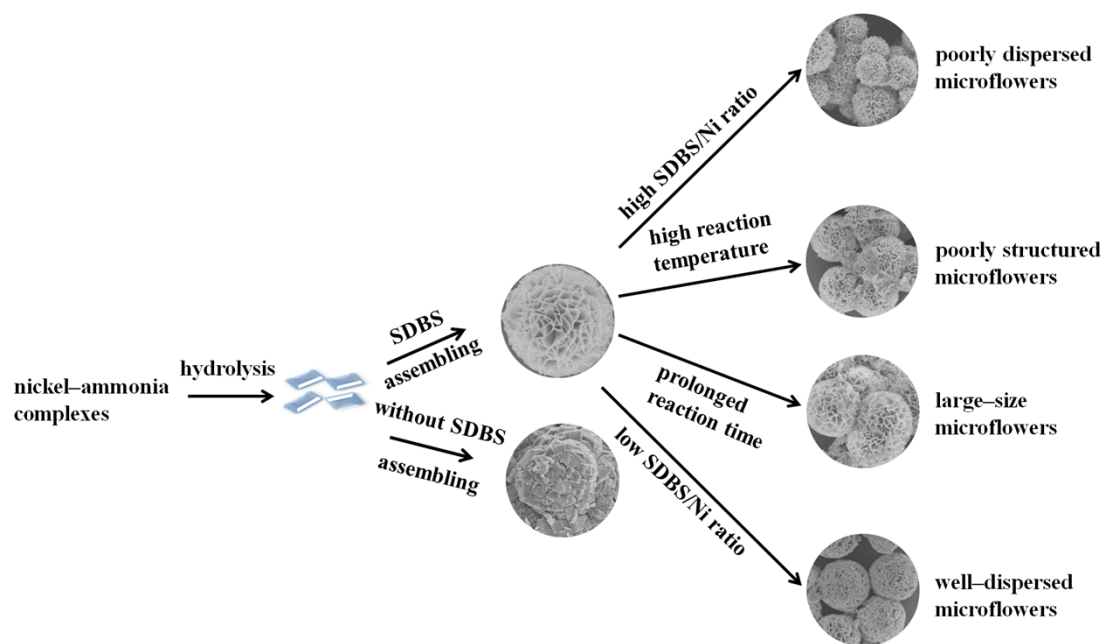

**Fig. S3** Schematic illustration of the formation of hierarchically structured  $\text{Ni}(\text{OH})_2$  particles.

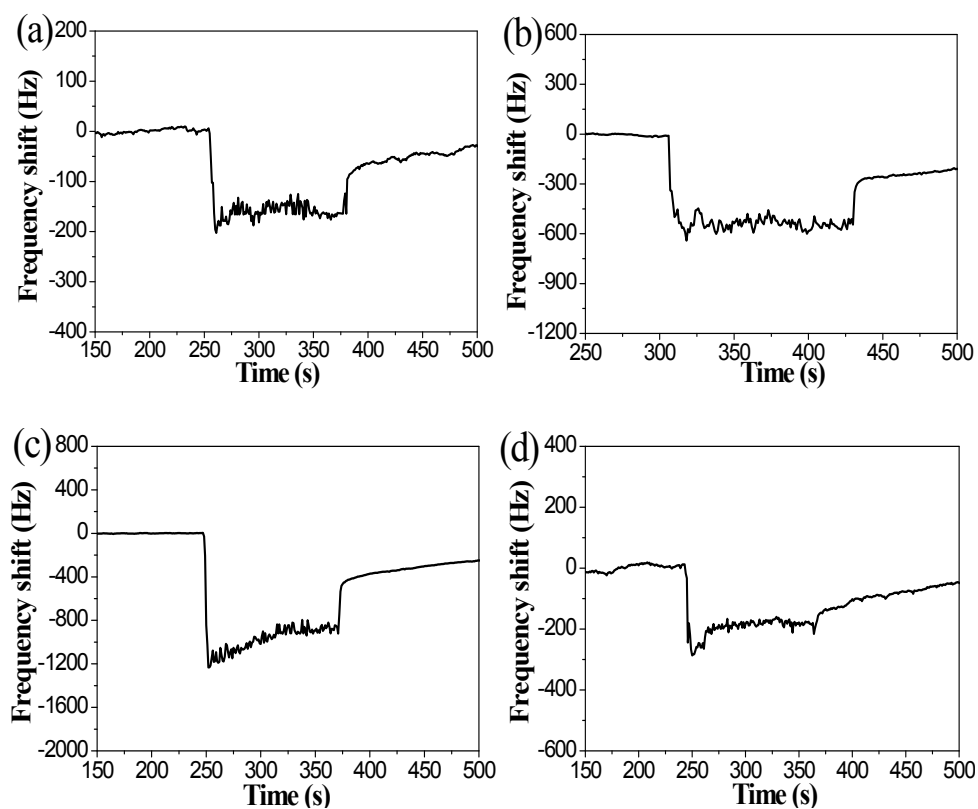

**Fig. S4** Response profiles of Ni(OH)<sub>2</sub> modified QCM resonator towards: (a) acetone, (b) ethyl ether, (c) water, (d) ethanol. The Ni(OH)<sub>2</sub> was prepared using a SDBS/Ni molar ratio of 0.1 at 140 °C for 7 h.

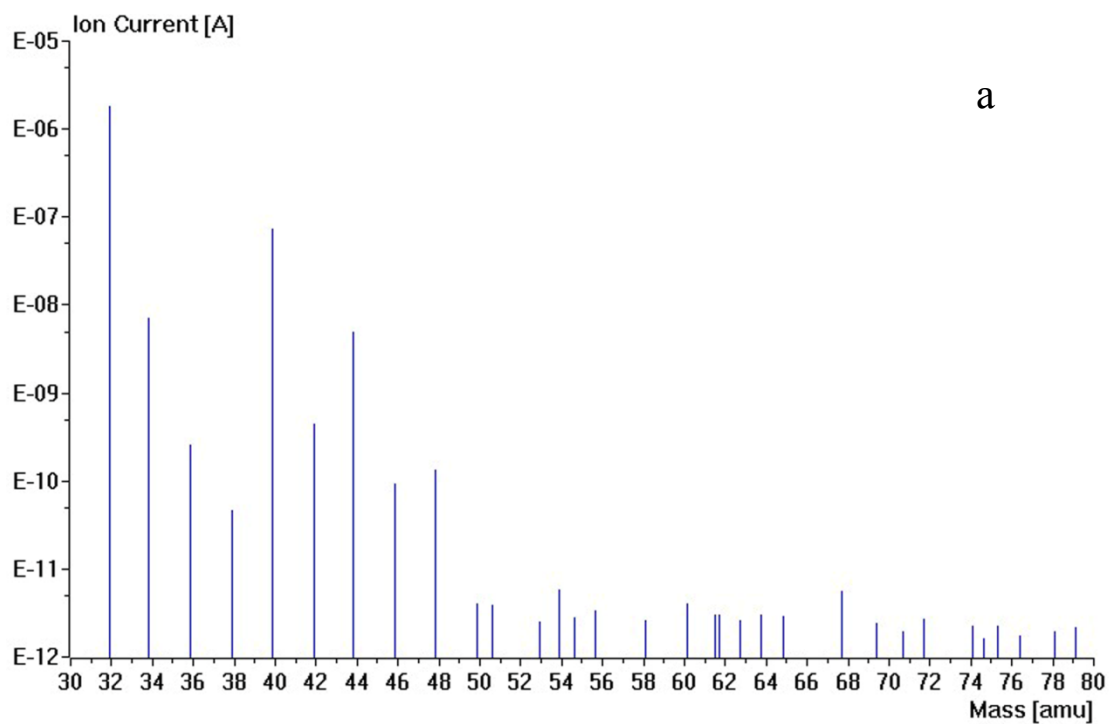

a

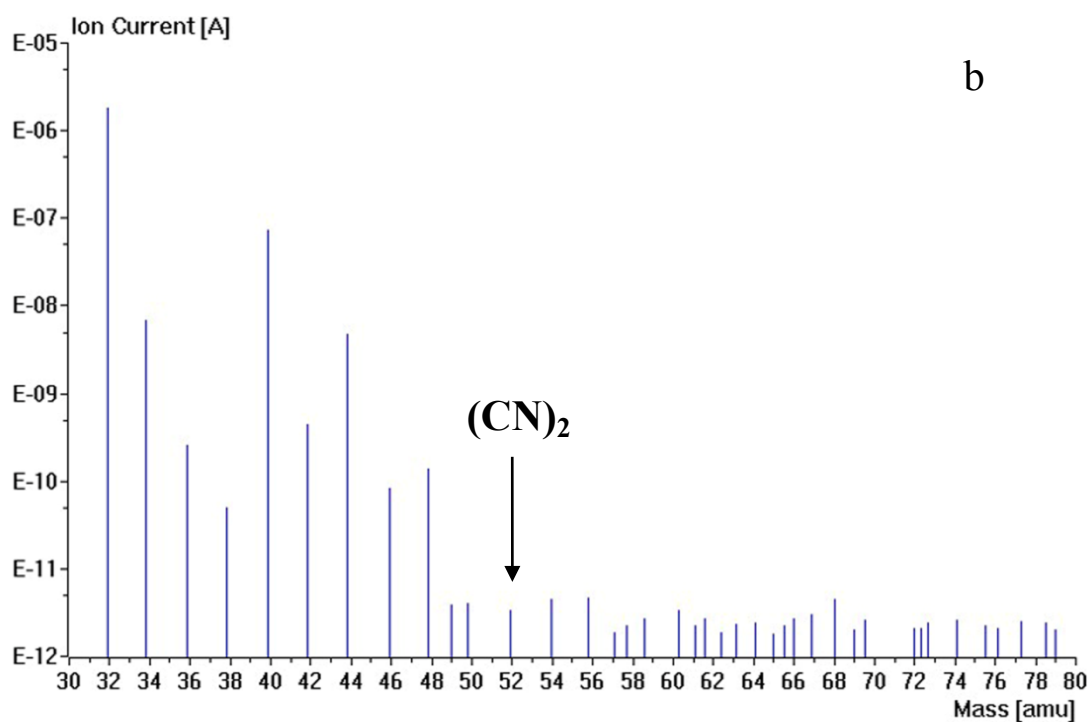

b

**Fig. S5** Mass spectra of HCN effluent before (a) and after (b) contact with Ni(OH)<sub>2</sub> modified QCM resonator.

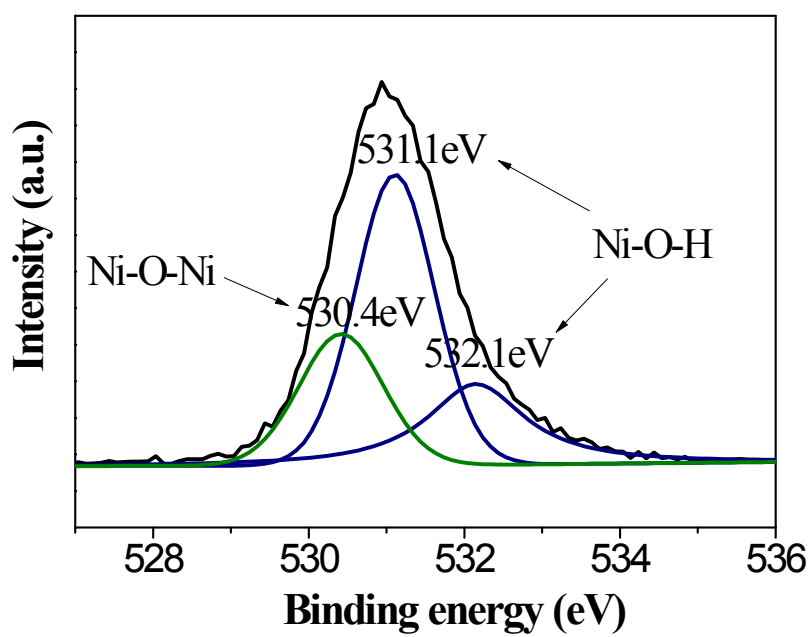

**Fig. S6** XPS O 1s spectra of Ni(OH)<sub>2</sub> prepared using a SDBS/Ni molar ratio of 0.1.

The hydrothermal temperature and reaction time are 100 °C and 7 h, respectively.

### Calculation of the active oxygen molecules mole number

1. Estimated by calculating the vacancy sites mole number of coated Ni(OH)<sub>2</sub> from XPS measurements

The surface molar ratio of Ni/vacancy sites is estimated to be 2:1 from XPS measurements (Fig. 7b). Thus, the active oxygen molecules mole number can be obtained by the following equation:

$$n_{o_2} = \frac{n_{Ni(OH)_2}}{2} = \frac{m_{Ni(OH)_2}}{2 \times M}$$

Where  $m$  (g) is the coating mass of Ni(OH)<sub>2</sub>,  $M$  is the molar mass of Ni(OH)<sub>2</sub>.

The coating mass of Ni(OH)<sub>2</sub> is 6 µg and the molar mass of Ni(OH)<sub>2</sub> is 92.7 g/mol.

Therefore, the mole number of active oxygen molecules is calculated to be  $3.24 \times 10^{-8}$  mol.

2. Estimated by calculating the vacancy sites mole number of coated Ni(OH)<sub>2</sub> from QCM measurements

From the Sauerbrey equation, we can obtain the mass decrease of coated Ni(OH)<sub>2</sub>.

If this mass decrease is due to the removal of active oxygen molecules, we can then



obtain the mole number of active oxygen molecules from the following equation:

$$n_{o_2} = \frac{A \times \Delta F}{-2.26 \times 10^{-6} \times F_0^2 \times M}$$

Where  $A$  ( $cm^2$ ) is the sensing surface area,  $\Delta F$  (Hz) is the frequency shift from initial HCN contact to sensing equilibrium,  $F_0$  (Hz) is the base frequency of quartz crystal,  $M$  is the molar mass of oxygen molecule.

From the above parameters, where  $A = 0.39$   $cm^2$ ,  $\Delta F = 1011$  Hz,  $F_0 = 9001274.5$  Hz,  $M = 32$  g/mol, we can therefore calculate the mole number of active oxygen molecules as  $6.73 \times 10^{-8}$  mol.
